# Supplementary material
Source: Springer Nature journal article supplement (https://www.springermedizin.de/resource/supplementary/12961_2012_259_MOESM2_ESM.pdf/9570982)
Supplement: MOESM2 [file 9570982]

### **Step 1: Research scoping**

**1a:** Research impact literature scan – selection of conceptual framework

**1b:** Development of data collection methods

**1c:** Determine sample frame for interviews

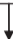

### **Step 2: Data collection**

**2a:** Determine sample frame for interviews

**2b:** In-depth interviews with Chief investigators (n=3)

**2c:** In-depth interviews with end users (n=9)

**2d:** Document verification & bibliometric analysis

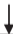

### **Step 3: Data Analysis**

**3a:** Case study preparation

**3b:** Impact assessment meeting

**3c:** Identify mediators of impact
